# Supplementary material for: Comparative biodistribution analysis across four different 89Zr-monoclonal antibody tracers—The first step towards an imaging warehouse
Source: PubMed Central journal article supplement — Theranostics. 2018 Jul 30;8(16):4295–304. doi: 10.7150/thno.26370 (PMC6134927; doi:10.7150/thno.26370), 2018-07-30
Supplement: thnov08p4295s1.pdf [file thnov08p4295s1.pdf]

# Supplementary Materials

## Table S1. Standard delineation protocol

### 1. Reconstruction method

According to Makris et al. [1]

### 2. Analysis plan

PET image analysis of scans performed 4 days post tracer injection.

Targets to select for PET quantification:

- Tumor lesions
- Background regions (=healthy organs/tissue)
- Whole organs

PET quantification parameters

- Background regions: %ID/kg
- Tumor lesions: volume (mL)
- Whole organs: %ID/kg

Software

- A medical imaging data examiner (AMIDE, [2])

### **Targets**

Lesions

- All visible lesions on PET and/or on diagnostic CT scan

Background regions

- For each background organ a background area should be quantified.
- Use an sphericalVOI (location and/or size of VOI might be adapted in case of tumor locations) in at least 3 consecutive axial planes:
  - Brain 5 cm (left hemisphere, parietal)
  - Lung 5 cm (right upper lobe, mediolateral)
  - Aortic blood pool 2 cm (Aortic arch or thoracic aorta, highest region)
  - Muscle 5 cm (region right gluteus maximus/medius)
  - Spleen 5 cm (representative region; 4 cm if 5 cm VOI is too big) and 2 cm (highest region)
  - Liver 5 cm (representative region)
  - Kidney 2 cm (cortex of left kidney, highest region)
  - Bone marrow 2 cm (L4 or L5)

- 1           ○ Bone cortex 1 cm (femur cortex, right)
- 2           ○ Intestine 2 cm (highest region)
- 3           ○ Fat tissue 2 cm (abdominal region)

4

5 Whole organ analysis

- 6       • Only assess organs when there is no metastatic disease located in this certain
- 7       organ
- 8       • Organs of interest for whole organ analysis:
- 9       ○ Liver

10

### 11 **Calculations**

12 AMIDE output (mean activity concentration in Bq/cc) was used to calculate the  
13 percentage injected dose per kilogram (%ID/kg) tissue of every VOI with the following  
14 formula:

$$\%ID/kg = \frac{\text{Activity concentration (Bq/kg)}}{\text{Injected activity (Bq)}} * 100\%$$

15 Injected activity was corrected for decay between moment of tracer injection and time of  
16 scanning (under the assumption of a tissue density of 1 kg/L).

17

18 Percentage organ and fat tissue tracer uptake was calculated using the following  
19 formula:

$$\text{Organ uptake (\%)} = \frac{\text{Activity concentration (Bq/gr)} * \text{Organ volume (gr)}}{\text{Injected activity (Bq)}} * 100\%$$

20 **Table S2.** Detailed information antibody and tracer characteristics

|                                                   | <sup>89</sup> Zr-lumretuzumab                                                                                                          | <sup>89</sup> Zr-MMOT0530A                                                                                                                        | <sup>89</sup> Zr-bevacizumab                       | <sup>89</sup> Zr-trastuzumab                     |
|---------------------------------------------------|----------------------------------------------------------------------------------------------------------------------------------------|---------------------------------------------------------------------------------------------------------------------------------------------------|----------------------------------------------------|--------------------------------------------------|
| Pharmacokinetic parameters of monoclonal antibody |                                                                                                                                        |                                                                                                                                                   |                                                    |                                                  |
| Monoclonal antibody                               | Lumretuzumab                                                                                                                           | MMOT0530A                                                                                                                                         | Bevacizumab                                        | Trastuzumab                                      |
| IgG class                                         | Humanized glycoengineered IgG1 $\kappa$                                                                                                | Humanized IgG1                                                                                                                                    | Humanized IgG1                                     | Humanized IgG1                                   |
| Target                                            | HER3                                                                                                                                   | Mesothelin                                                                                                                                        | VEGF                                               | HER2                                             |
| Molecular weight (kDa)                            | 150                                                                                                                                    | 150                                                                                                                                               | 150                                                | 150                                              |
| Linear kinetics                                   | Elimination of lumretuzumab across dose range 100 - 400 mg is predominantly target mediated; PK approached linearity at 400 - 2,000 mg | Modest degree of target mediated clearance at doses < 1 mg/kg; linear clearance across tested dose range of 0.2 to 2.8 mg/kg for the q3w schedule | Linear pharmacokinetics for doses 1 - 10 mg/kg     | Non-linear elimination                           |
| Clearance                                         | 1.04 L/d (100 mg);<br>0.264 L/d (>2000 mg)                                                                                             | 27 mL/d/kg                                                                                                                                        | 0.188 L/d - 0.220 L/d                              | 0.111 L/d                                        |
| Volume of distribution                            | 3.64 L (100 mg);<br>4.4 L (>2000 mg)                                                                                                   | V <sub>ss</sub> = 68 mL/kg                                                                                                                        | 2.73 - 3.28 L                                      | 2.91 L                                           |
| Elimination half-life time                        | 2.4 d (100 mg);<br>12 d (>400 mg)                                                                                                      | 2.1 - 3.7 d                                                                                                                                       | 18-20 d                                            | 28.5 d                                           |
| Reference                                         | Meulendijks et al. [3]                                                                                                                 | Weekes et al. [4]                                                                                                                                 | European public assessment report of Herceptin [5] | European public assessment report of Avastin [6] |

21

22 **Table S2.** Continued.

|                                                        | <sup>89</sup> Zr-lumretuzumab                                            | <sup>89</sup> Zr-MMOT0530A                              | <sup>89</sup> Zr-bevacizumab         | <sup>89</sup> Zr-trastuzumab               |
|--------------------------------------------------------|--------------------------------------------------------------------------|---------------------------------------------------------|--------------------------------------|--------------------------------------------|
| Information on the <sup>89</sup> Zr-labeled antibodies |                                                                          |                                                         |                                      |                                            |
| Chelator                                               | TFP- <i>N</i> -sucDf                                                     | TFP- <i>N</i> -sucDf                                    | TFP- <i>N</i> -sucDf                 | TFP- <i>N</i> -sucDf                       |
| Chelator:mAb conjugation ratio                         | 1.5 ± 0.1                                                                | 1.5 ± 0.1                                               | 1.5 ± 0.1                            | 1.3 ± 0.1                                  |
| <i>In vitro</i> serum stability                        | Stable in serum; < 5% decrease in radiochemical purity (rcp) after 168 h | 2% decrease in rcp after 168 h in normal saline at 20°C | 6% decrease rcp after 168 h in serum | 0.39 ± 0.02% decrease in rcp/ day in serum |
| Radiochemical purity (%)                               | > 98                                                                     | > 98                                                    | > 98                                 | > 98                                       |
| pH                                                     | 4 - 7                                                                    | 5 - 8                                                   | 6 - 7                                | 5-8                                        |
| Immunoreactivity (%)                                   | Preserved                                                                | > 70                                                    | > 60                                 | > 70                                       |
| Appearance                                             | Colorless to light yellow                                                | Colorless to light yellow liquid                        | Colorless                            | Colorless                                  |
| Bacterial endotoxins (EU/mL)                           | < 2.5                                                                    | < 2.5                                                   | < 1.0                                | < 2                                        |
| Aggregates (%)                                         | < 5                                                                      | < 5                                                     | < 3                                  | < 5                                        |
| Sterility                                              | Sterile                                                                  | Sterile                                                 | Sterile                              | Sterile                                    |

23 <sup>89</sup>Zr, Zirconium-89; IgG, Immunoglobuline gamma; HER, Human epidermal growth factor receptor; mAb, monoclonal antibody; rcp, radiochemical purity;24 TFP-*N*-sucDf, tetrafluorophenol-*N*-succinyl-desferal; VEGF, Vascular endothelial growth factor receptor; Vss, steady state volume of distribution.

25 **Table S3.** Details on deposited data and curation process

26

27 Data deposit

28 An overview over the deposited datasets including details on the dataset, contact  
29 information, information on requesting and depositing data can be found online  
30 under [www.imagingwarehouse.eu](http://www.imagingwarehouse.eu).

31

32 Deposited data

33 Information on the individual subject and imaging data per individual subject will be  
34 deposited.

35

36 Specification of the deposited data for the four <sup>89</sup>Zr-mAb tracers analyzed in the  
37 current manuscript:

38

39 **Patient related information:**

40 Weight, height, total tumor load (PET based, mL), injected [netto] dose, time  
41 between tracer injection and start of PET scan, activity on the day of tracer  
42 injection.

43

44 **PET imaging data per individual patient:**

45 AMIDE output and SUV calculations for blood and normal organ VOI's: aorta,  
46 liver, kidney, fat tissue, muscle, brain, lung, spleen, intestine, femur cortex and  
47 bone marrow.

48 AMIDE output per VOI includes median, mean, variance, standard deviation,  
49 minimum, maximum and size (mm<sup>3</sup>).

50 SUV calculations include SUVmean and SUVmax.

51

52 Data to be deposited by external parties should include at least above mentioned  
53 patient related information and PET related information. Thereby, the administered  
54 radiation dose is not restricted to 37 MBq, as the dose can vary. Information on the  
55 used analysis tool and/or algorithm should also be deposited. Throughout time,  
56 requirements on which data to be deposited might change, therefore, it is  
57 recommended to consult the website for further instructions  
58 ([www.imagingwarehouse.eu](http://www.imagingwarehouse.eu)).

59

60

61 Data request

62 All data will be provided upon request. Requests can be send by email to the  
63 imaging warehouse group ([imagingwarehouse@onco.umcg.nl](mailto:imagingwarehouse@onco.umcg.nl)). Data can be  
64 requested by health care professionals and all scientific personnel. Data is provided  
65 for research purpose only.

66

67 Re-processing of imaging data with other reconstruction protocols and additional  
68 information can be requested. Whether requested data can be provided, will be  
69 decided by the for the dataset responsible researcher or delegates (*e.g.* based on  
70 privacy laws).

71

72 **Request format**

73 All requests need to contain a specification of the requested data set, information on  
74 the requesting person or group including name of the responsible investigator,  
75 function and institution. Furthermore, a short description of the intended  
76 aim/research question is preferred.

77

78 Public disclosure and publication policy

79 Provenance of the data must be stated and data needs to be referenced to in all  
80 publications in written form, oral presentation or publication in any other form.

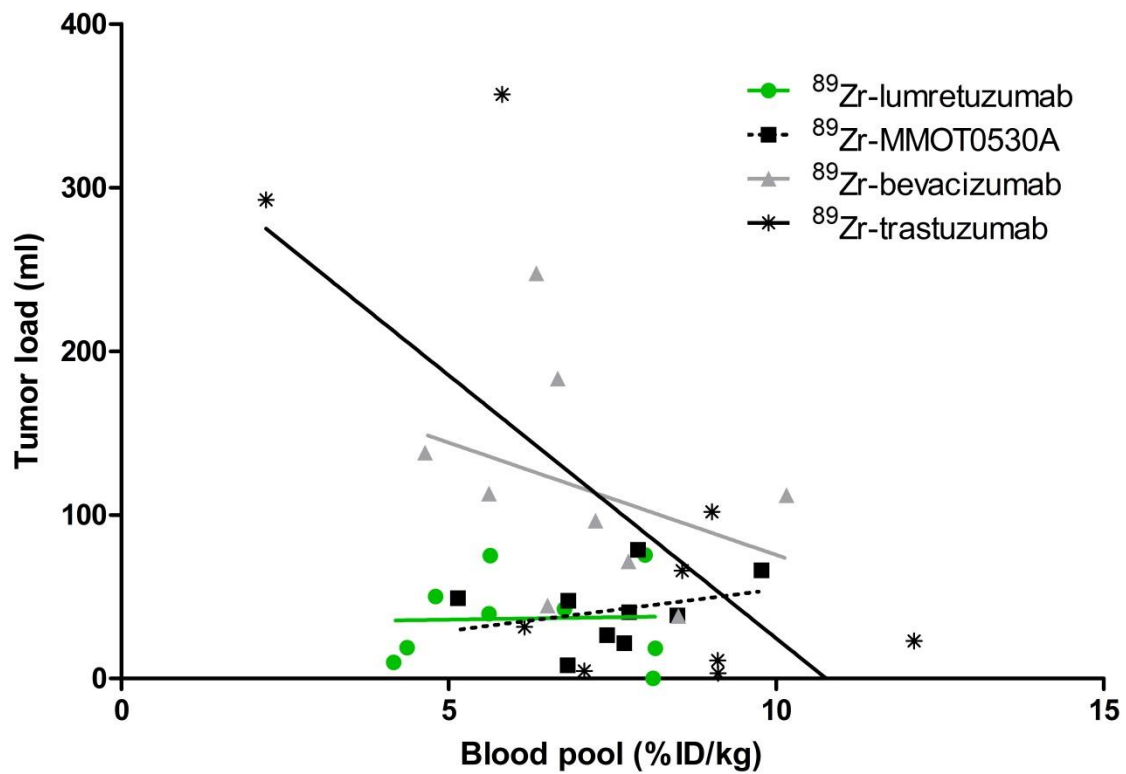

81

82 **Figure S1.** Correlation between activity in the aorta (%ID/kg) and tumor load (ml)  
 83 for  $^{89}\text{Zr}$ -lumretuzumab ( $r^2=0.00$ ,  $P=0.93$ ),  $^{89}\text{Zr}$ -MMOT0530A ( $r^2=0.09$ ,  $P=0.44$ ),  $^{89}\text{Zr}$ -  
 84 bevacizumab ( $r^2=0.11$ ,  $P=0.38$ ) and  $^{89}\text{Zr}$ -trastuzumab ( $r^2=0.46$ ,  $P=0.05$ ).

85 **References:**

- 86 1. Makris NE, Boellaard R, Visser EP, et al. Multicenter harmonization of <sup>89</sup>Zr  
87 PET/CT performance. *J Nucl Med.* 2014; 55: 264-267.
- 88 2. Loening AM, Gambhir SS. AMIDE: a free software tool for multimodality medical  
89 image analysis. *Mol Imaging.* 2003; 2: 131-137.
- 90 3. Meulendijks D, Jacob W, Martinez-Garcia M, et al. First-in-human phase I study of  
91 lumretuzumab, a glycoengineered humanized anti-HER3 monoclonal antibody in  
92 patients with metastatic or advanced HER3-positive solid tumors. *Clin Cancer*  
93 *Res.* 2016; 22: 877-885.
- 94 4. Weekes CD, Lamberts LE, Borad MJ, et al. Phase I study of DMOT4039A, an  
95 antibody-drug conjugate targeting mesothelin, in patients with unresectable  
96 pancreatic or platinum-resistant ovarian cancer. *Mol Cancer Ther.* 2016; 15: 439-  
97 447.
- 98 5. European Medicines Agency, European public assessment report of Herceptin.  
99 Revised 13/12/2017. [http://www.ema.europa.eu/ema/index.jsp?curl=pages](http://www.ema.europa.eu/ema/index.jsp?curl=pages/medicines/human/medicines/000278/human_med_000818.jsp&mid=WC0b01ac058001d124)  
100 [/medicines/human/medicines/000278/human\\_med\\_000818.jsp&mid=WC0b01a](http://www.ema.europa.eu/ema/index.jsp?curl=pages/medicines/human/medicines/000278/human_med_000818.jsp&mid=WC0b01ac058001d124)  
101 [c058001d124](http://www.ema.europa.eu/ema/index.jsp?curl=pages/medicines/human/medicines/000278/human_med_000818.jsp&mid=WC0b01ac058001d124)
- 102 6. European Medicines Agency, European public assessment report of Avastin.  
103 Revised 15/12/2017. [http://www.ema.europa.eu/ema/index.jsp?curl=pages](http://www.ema.europa.eu/ema/index.jsp?curl=pages/medicines/human/medicines/000582/human_med_000663.jsp&mid=WC0b01ac058001d124)  
104 [/medicines/human/medicines/000582/human\\_med\\_000663.jsp&mid=WC0b01a](http://www.ema.europa.eu/ema/index.jsp?curl=pages/medicines/human/medicines/000582/human_med_000663.jsp&mid=WC0b01ac058001d124)  
105 [c058001d124](http://www.ema.europa.eu/ema/index.jsp?curl=pages/medicines/human/medicines/000582/human_med_000663.jsp&mid=WC0b01ac058001d124)
